# Supplementary material
Source: PubMed Central journal article supplement (PMC2863164)
Supplement: supp_M110.104745_jbc.M110.104745-1.pdf [file supp_M110.104745_jbc.M110.104745-1.pdf]

|       |        |             |                        |         |        |         |
|-------|--------|-------------|------------------------|---------|--------|---------|
| 56897 | WRNIP1 | Hs_WRNIP1_1 | CGCCATGTTCATAGAGGATAA  | -0.1027 | 0.1173 | 0.0575  |
| 56897 | WRNIP1 | Hs_WRNIP1_5 | ATGAATTAATGTTATAAGGAA  | -0.0085 | 0.9415 | 0.0066  |
| 56949 | XAB2   | Hs_XAB2_6   | CCGCGTGACAAAGTCACTGAA  | 0.2216  | 0.1349 | -0.0060 |
| 56949 | XAB2   | Hs_XAB2_5   | CACGTACAACACGCAGGTCAA  | 0.2419  | 0.0643 | -0.0371 |
| 7507  | XPA    | Hs_XPA_5    | AGGGAGACGATTGTTTCATCAA | -0.0066 | 0.9263 | 0.0065  |
| 7507  | XPA    | Hs_XPA_6    | CTGCAGAGATGCTGATGATAA  | 0.0328  | 0.5365 | -0.1634 |
| 7709  | ZBTB17 | Hs_ZBTB17_1 | CCCTTCTGACTGTTTATTTAA  | -0.0447 | 0.2756 | 0.0622  |
| 7709  | ZBTB17 | Hs_ZBTB17_2 | CCGCCTCATCAGCCTGCTGAA  | 0.0586  | 0.3144 | -0.0441 |

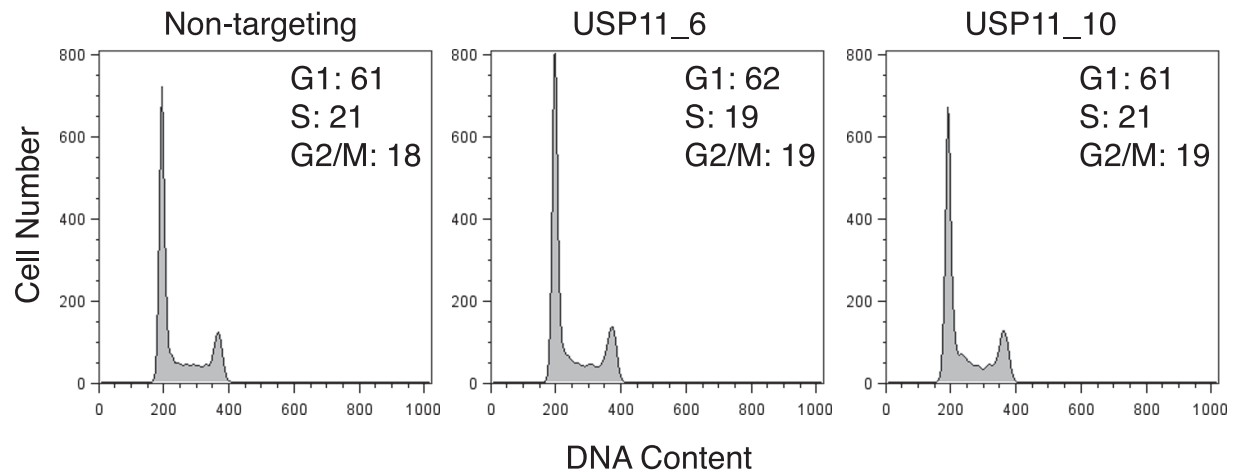

Fig S1. USP11 silencing does not alter cell proliferation. U2OS cells were analyzed for DNA content by flow cytometry 72h after transfection with non-targeting, USP11\_6, or USP11\_10 siRNAs.
